# Supplementary material
Source: PubMed Central journal article supplement (PMC5274719)
Supplement: NIHMS841614-supplement-Supplementary_Materials.pdf [file NIHMS841614-supplement-Supplementary_Materials.pdf]

## Supplementary Materials for

### **Augmented noncanonical BMP type II receptor signaling mediates the synaptic abnormality of fragile X syndrome**

Risa Kashima, Sougata Roy, Manuel Ascano, Veronica Martinez-Cerdeno, Jeanelle Ariza-Torres, Sunghwan Kim, Justin Louie, Yao Lu, Patricio Leyton, Kenneth D. Bloch, Thomas B. Kornberg, Paul J. Hagerman, Randi Hagerman, Giorgio Lagna, Akiko Hata\*

\*Corresponding author. Email: akiko.hata@ucsf.edu

Published 7 June 2016, *Sci. Signal.* **9**, ra58 (2016)  
DOI: 10.1126/scisignal.aaf6060

#### **The PDF file includes:**

Fig. S1. Translational regulation of BMPR2 through the mRNA sequence encoding the CTD.

Fig. S2. FMRP binds BMPR2-CTD<sub>seq</sub> and suppresses translation.

Fig. S3. BMP4-SMAD1/5 signaling is increased, but TGFβ-SMAD2/3 signaling is not altered in *FMR1*-null cells.

Fig. S4. LIMK-i and LDN effectively inhibit LIMK1 and BMPR1 kinase activity in N1E cells.

Fig. S5. In vivo administration of LIMK-i inhibits phosphorylation of cofilin in mouse brain.

Table S1. qRT-PCR primers.

Table S2. RIP PCR primers.

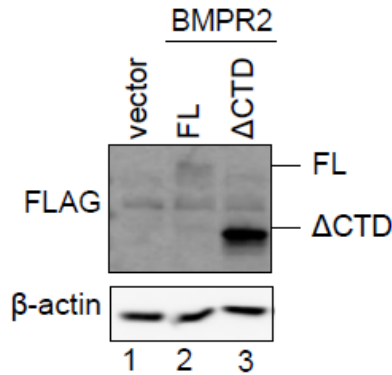

**Figure S1. Translational regulation of BMPR2 through the mRNA sequence encoding the CTD (*CTDseq*).** Cos7 cells were transfected with FLAG-tagged BMPR2 FL or  $\Delta$ CTD expression vectors, and immunoblotting analysis was performed using FLAG monoclonal  $\beta$ -actin (loading control) antibodies. Blot is representative of 10 experiments.

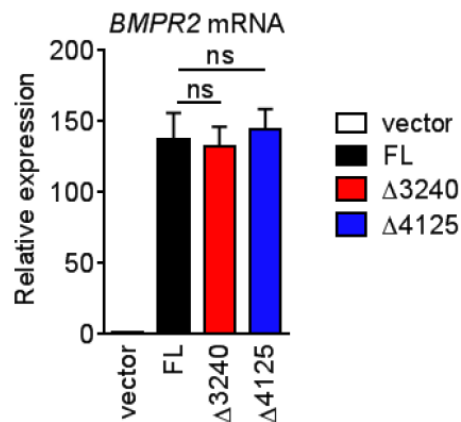

**Figure S2. FMRP binds BMPR2-*CTDseq* and suppresses translation.** HEK293 cells were transfected with BMPR2 FL,  $\Delta$ 3240 or  $\Delta$ 4125 and mRNA expression of *BMPR2 FL* and deletion mutants were examined by qRT-PCR and normalized to *GAPDH*. Data are means  $\pm$  SD (N=3 experiments). ns, no significance by ANOVA with post hoc Tukey's test.

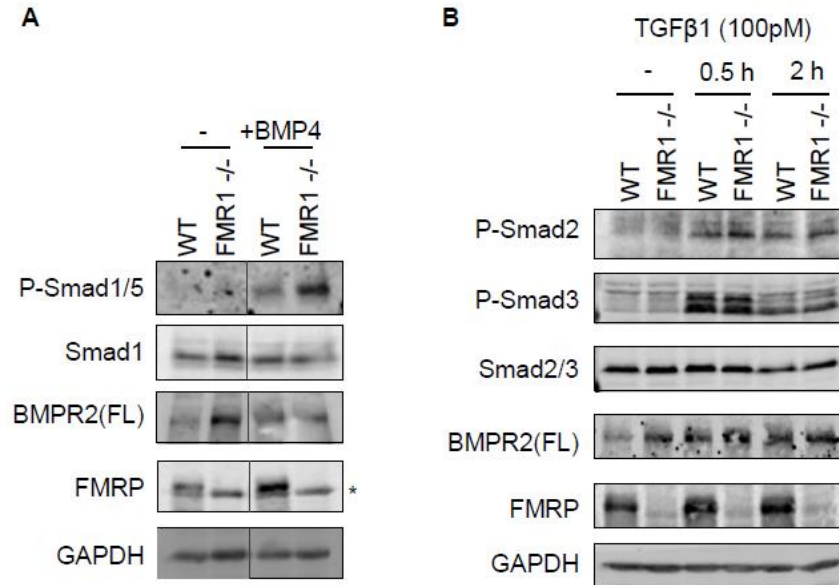

**Figure S3. BMP4-SMAD1/5 signaling is increased, but TGFβ-SMAD2/3 signaling is not altered in *FMR1*-null cells.** MEFs isolated from *FMR1* knock-out (*FMR1*<sup>-/-</sup>) and wild-type (WT) mice were treated with 500 pM BMP4 (**A**) for 2 hours or 100 pM of TGFβ1 (**B**) for indicated periods. Phosphorylated SMAD (P-Smad), total SMAD, BMPR2(FL), FMRP, or GAPDH protein abundance was analyzed by immunoblotting. Asterisk indicates a non-specific band in the FMRP panel. Blots are representative of 3 experiments.

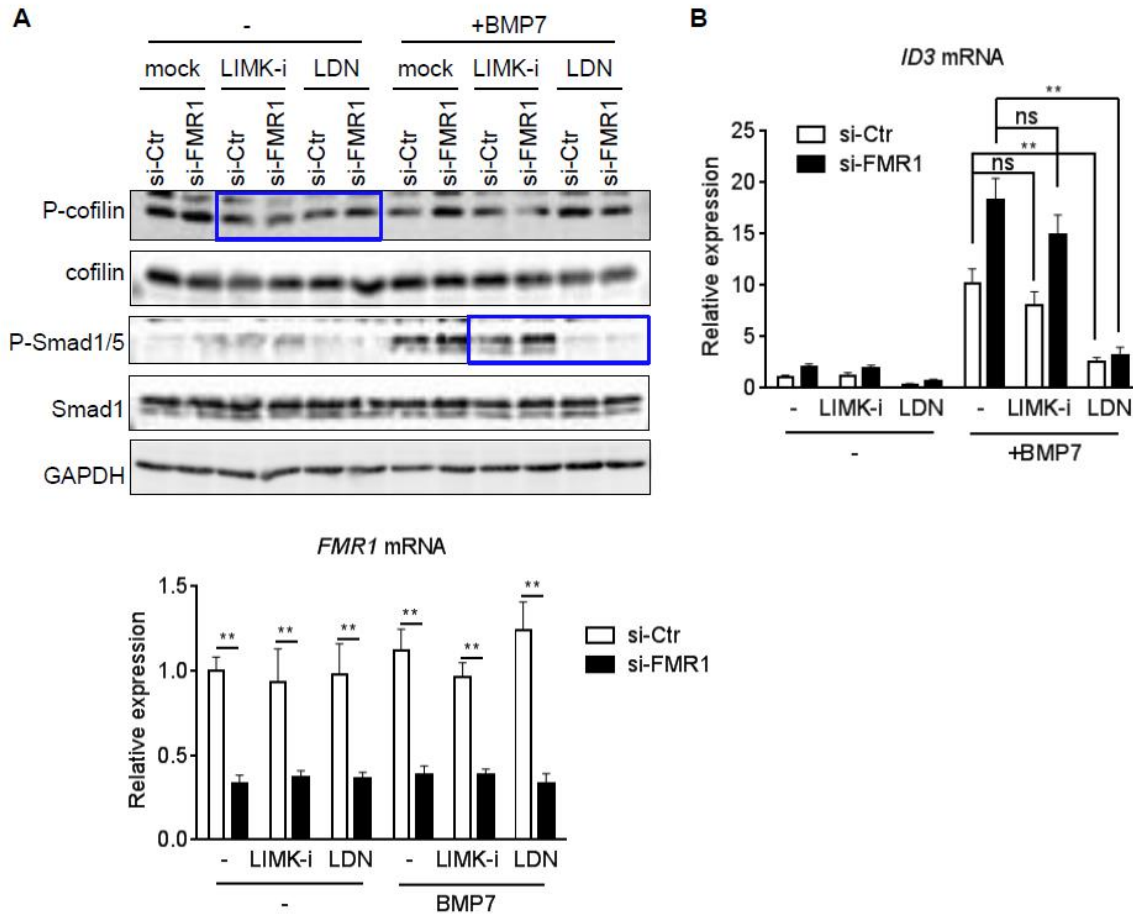

**Figure S4. LIMK-i and LDN effectively inhibit LIMK1 and BMPR1 kinase activity in N1E cells.** N1E cells transfected with si-Control (si-Ctr) or si-*FMR1* were treated with mock (DMSO), LDN-193189 (LDN) or LIMKi-3 (LIMK-i) with or without 10 ng/ml BMP7 for 30 min, followed by (A) Immunoblot analysis of P-cofilin, total cofilin, P-SMAD1/5, total SMAD1 and GAPDH (top). Knock down of FMR1 by si-*FMR1* was confirmed by qRT-PCR analysis (bottom). Data are means  $\pm$  SD (N=3). \*\* $P$ <0.001 by Student's t-test. (B) qRT-PCR analysis of *Id3* mRNA, a transcriptional target of Smad1/5, indicates effective inhibition of the canonical Smad pathway by LDN, but not by LIMK-i. Data are means  $\pm$  SD (N=3 experiments). \*\* $P$ <0.001 by ANOVA with post hoc Tukey's test.

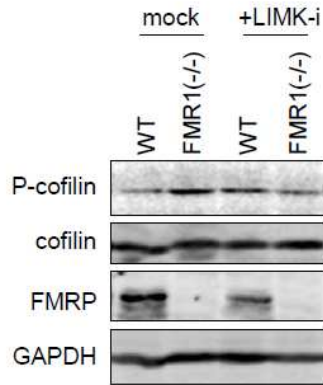

**Figure S5. In vivo administration of LIMK-i inhibits phosphorylation of cofilin in mouse brain.** *FMR1*<sup>(-/-)</sup> or littermate wild-type (WT) mice were treated with LIMK-i by intracerebroventricular injection at P1 and P4, and the brains were isolated at P7. Protein abundance was analyzed by immunoblotting using indicated antibodies. Blots are representative of 3 experiments.

| Gene        | species                      | forward primer                 | reverse primer                   |
|-------------|------------------------------|--------------------------------|----------------------------------|
| BMPR2       | human                        | 5'- GGGTAAGCTCTTGCCGCTTGCT -3' | 5'- CCCCTGGGCGCACCAGTCTAT -3'    |
| BMPR2 FL    | human                        | 5'- GAAGACTGTTGGGACCAGGA -3'   | 5'- TGTGACAGGTTGCGTTCATT -3'     |
| BMPR2 Δ CTD | human                        | 5'- GAAGACTGTTGGGACCAGGA -3'   | 5'- TCCTGATTTGCATCTTGTG -3'      |
| BMPR2 FL    | mouse                        | 5'- GAAGACTGCTGGGACCAGGAT -3'  | 5'- TGTGACAGGTTGCGTTCATT -3'     |
| BMPR2 Δ CTD | mouse                        | 5'- GAAGACTGCTGGGACCAGGAT -3'  | 5'- GCCATCTTGTGTTGACTCACCTA -3'; |
| BMPR2       | rat                          | 5'- CAGACCCGTTGAGCAGTAC -3'    | 5'- GCCCTATGTGCCACTATG -3'       |
| FMR1        | human, monkey, mouse and rat | 5'- GGCTCCAATGGCGCTTTCTAC -3'  | 5'- TAGCTAACCAACAGCAAGGCT -3'    |
| LIMK1       | mouse                        | 5'- GGAGCCGGTGTCCCTCAAG -3'    | 5'- CTCGCTTCCTTCCCTCCCATAC -3'   |
| Smad7       | mouse                        | 5'- TCTCAAACCAACTGCAGGCT -3'   | 5'- TCTTGCTCCGCACCTTTCTGT -3'    |
| CTGF        | mouse, rat                   | 5'- GATGGTGCACCCTGTGTCTT -3'   | 5'- AGTCGGTAGGCAGCTAGGG -3'      |
| Id1         | rat                          | 5'- GAACCGCAAAGTGAGCAAGG -3'   | 5'- AACACATGCCGCTCGG -3'         |

**Table S1: qRT-PCR primers.** The sequences of the primers used in the qRT-PCR assays are provided.

| position          | forward primer                       | reverse primer                                 |
|-------------------|--------------------------------------|------------------------------------------------|
| BMPR2 1820 – 1995 | 5'- GCGTCCAGTTGCTGTAAAAGTG -3'       | 5'- GATAGTACTCCATCACAAGCAAATATTCC -3'          |
| BMPR2 2041 – 2250 | 5'- GGGTAAGCTCTTGCCGCTTGCT -3'       | 5'- CCCCTGGGCGCACCAGTCTAT -3'                  |
| BMPR2 2513 – 2693 | 5'- GGAAAACAGAGACCCAAGTTCCCA -3'     | 5'- GCTCACAGATTTGTTTCTTCCCAAATCATCA -3'        |
| BMPR2 2736 – 2928 | 5'- AACCTGTCACATAATAGGCGTGTGCCAA -3' | 5'- CTTGCTGTCGTTTATAGTTAATTGAATTCGGT -3'       |
| BMPR2 3116 – 3278 | 5'- ACAGCTGACAGAAGAAGACTTGGAA -3'    | 5'- GAGTGGGTAAGCAAGCTAGAATA -3'                |
| BMPR2 3240 – 3409 | 5'- CCACTGAGCAGTACTAGTCTAGCT -3'     | 5'- CTCTGGGAAGGTTCTGCTGCTT -3'                 |
| BMPR2 3630 -3780  | 5'- GGGACAGTACTATCTGGCCAAACAA -3'    | 5'- CAGCTTGTGCTCTCCTCAGT -3'                   |
| BMPR2 4125 -FLAG  | 5'- ACTGAATCGCTGGACTGTGAAGTCA -3'    | 5'- CCTTAGACATATGTTATTTGTCATCATCGTCCATTATA -3' |
| BMPR2 3468 – 3641 | 5'- GGCAGCAAGCACAAATCAAACCTTG -3'    | 5'- TGTGGCAGCATGGGAGTTAACACT -3'               |

**Table S2: RIP PCR primers.** The sequences of the primers used in the RIP assays are provided.
